# Supplementary material
Source: publisher figshare collection journal article supplement (https://plos.figshare.com/articles/dataset/_/5595163)
Supplement: Supplementary file [file 1]

**S2 Table. Primers for real-time PCR**

| <b>Unigene</b>  | <b>Forward primer</b> | <b>Reverse primer</b> |
|-----------------|-----------------------|-----------------------|
| c33229.graph_c0 | CGTAGCAGACGGTCGTACTC  | CGCAGCTGATTGGTTGAACA  |
| c36418.graph_c0 | CGGGGGCACAGCTAGCATATT | GGGGGTGTCCATTAATTGCG  |
| c59923.graph_c1 | TGCCGCCCTGAAGAAAACAA  | ACACATCATGAACCGACGTG  |
| c68914.graph_c0 | GTGTAGAGCGTCCCCTGAAT  | AGCTGGCTGATGGGTCTAAC  |
| c73192.graph_c0 | CGAAGATACAGAGGACCGGC  | AGCACCAACTGCTCCCTTAC  |
| c76833.graph_c0 | CACAAGCCAGCTACATCCCA  | CGAAGCGTGCCTCGTACTAT  |
| c79869.graph_c1 | ATCACCTCCTGCCAACGAAG  | TCGTCGCTCATTCTCGCTAC  |
| Actin           | CGACTTCGAACAGGAGATGG  | TCGTCTCATGAATGCCACAG  |
